# Supplementary material for: Specificity and costs of inducible defense in the barnacle Chthamalus fissus (Darwin, 1854)
Source: Oxford University Press journal article supplement (doi:10.1093/jcbiol/ruy052), 2018-07-16
Supplement: ruy052_suppl_supplementary_material_table_s1.docx [file ruy052_suppl_supplementary_material_table_s1.docx]

**Table S1**. ANCOVA for log operculum width of *Chthamalus fissus*. Log operculum length was used as the covariate and mollusc shell type was the fixed factor (*df*, degrees of freedom; MS, mean square; *F*, value of F-statistic).

| Source of variation | *df* | MS | *F* | *P* |
| --- | --- | --- | --- | --- |
| Model | 8 | 5.045 | 1807.3 | < 0.0001 |
| Shell Type | 4 | 2.90 | 1038.7 | < 0.0001 |
| Log Operculum Length Shell Type * Log Operculum Length  Error | 1  3  185 | 2.39  0.013  0.003 | 856.5  4.70 | < 0.0001  0.003 |
