# Supplementary material for: Specificity and costs of inducible defense in the barnacle Chthamalus fissus (Darwin, 1854)
Source: Oxford University Press journal article supplement (doi:10.1093/jcbiol/ruy052), 2018-07-16
Supplement: ruy052_suppl_supplementary_material_table_s2.docx [file ruy052_suppl_supplementary_material_table_s2.docx]

**Table S2.** ANCOVA for operculum width (mm) of *Chthamalus fissus*. Operculum Length (mm) was used as the covariate and location of collection was the fixed factor (*df*, degrees of freedom; MS, mean square; *F*, value of F statistic).

| Source of variation | *df* | MS | *F* | *P* |
| --- | --- | --- | --- | --- |
| Model | 6 | 2.063 | 1072.8 | < 0.0001 |
| Location | 3 | 0.013 | 6.7 | < 0.0001 |
| Operculum Length | 1 | 0.579 | 301.3 | < 0.0001 |
| Location * Operculum Length  Error | 2  132 | 0.003  0.002 | 1.42 | 0.245 |
