# Supplementary material for: Specificity and costs of inducible defense in the barnacle Chthamalus fissus (Darwin, 1854)
Source: Oxford University Press journal article supplement (doi:10.1093/jcbiol/ruy052), 2018-07-16
Supplement: ruy052_suppl_supplementary_material_table_s3.docx [file ruy052_suppl_supplementary_material_table_s3.docx]

**Table S3**. ANCOVA for log egg number of *Chthamalus fissus*. Cirrus 1 exopodite length was used as the covariate and barnacle morph was the fixed factor (*df*, degrees of freedom; MS, mean square; *F*, value of F-statistic).

| Source of variation | *df* | MS | *F* | *P* |
| --- | --- | --- | --- | --- |
| Model | 6 | 226.97 | 6081.3 | < 0.0001 |
| Morph | 3 | 7.08 | 189.7 | < 0.0001 |
| Cirrus 1 Length | 1 | 4.12 | 111.9 | < 0.0001 |
| Morph * Cirrus 1 Length  Error | 2  178 | 0.44  0.04 | 11.76 | < 0.0001 |
