# Supplementary material for: Specificity and costs of inducible defense in the barnacle Chthamalus fissus (Darwin, 1854)
Source: Oxford University Press journal article supplement (doi:10.1093/jcbiol/ruy052), 2018-07-16
Supplement: ruy052_suppl_supplementary_material_table_s4.docx [file ruy052_suppl_supplementary_material_table_s4.docx]

**Table S4**. ANCOVA for cirrus length comparisons among the three morphs of *Chthamalus fissus*. (*df*, degrees of freedom; MS; mean square; F, value of F-statistic; OL, operculum length).

Cirrus 6

| Source of variation | *df* | MS | *F* | *P* |
| --- | --- | --- | --- | --- |
| Model | 6 | 0.079 | 44.39 | <0.0001 |
| Morph | 3 | 0.025 | 13.59 | <0.0001 |
| log OL | 1 | 0.045 | 25.44 | <0.0001 |
| Morph * log OL  Error | 2  25 | 0.004  0.002 | 2.1 | 0.145 |

Cirrus 5

| Source of variation | *df* | MS | *F* | *P* |
| --- | --- | --- | --- | --- |
| Model | 6 | 6.54 | 425.0 | <0.0001 |
| Morph | 3 | 0.22 | 14.54 | <0.0001 |
| OL | 1 | 0.50 | 32.29 | <0.0001 |
| Morph * OL  Error | 2  25 | 0.007  0.015 | 0.47 | 0.629 |

Cirrus 4

| Source of variation | *df* | MS | F | *P* |
| --- | --- | --- | --- | --- |
| Model | 6 | 4.64 | 267.02 | <0.0001 |
| Morph | 3 | 0.19 | 10.96 | <0.0001 |
| OL | 1 | 0.27 | 15.68 | 0.001 |
| Morph * OL  Error | 2  25 | 0.01  0.02 | 0.31 | 0.736 |
